# Supplementary material for: ImiRP: a computational approach to microRNA target site mutation
Source: PubMed Central journal article supplement (PMC4848830; doi:10.1186/s12859-016-1057-y), 2016-04-27
Supplement: 12859_2016_1057_MOESM1_ESM.pdf [file 12859_2016_1057_MOESM1_ESM.pdf]

## Supplementary Figures

### Supplementary Figure 1. The number of mutant sequences that can be produced using various mutation-generation strategies.

**1a)**

$$\begin{aligned} \text{Total Mutant Sequences} &= \left[ \sum_{i=2}^N \binom{N}{i} (n-1)^i \right]^x \\ &= \left[ \sum_{i=2}^6 \binom{6}{i} (4-1)^i \right]^3 \\ &= \left[ \binom{6}{2} 3^2 + \binom{6}{3} 3^3 + \binom{6}{4} 3^4 + \binom{6}{5} 3^5 + \binom{6}{6} 3^6 \right]^3 \\ &\approx 6.8 \times 10^{10} \end{aligned}$$

**1b)**

$$\begin{aligned} \text{Total Mutant Sequences} &= \left[ \binom{N-1}{1} (n-1)^2 \right]^x \\ &= [(6-1)(4-1)^2]^3 \\ &\approx 9.1 \times 10^4 \end{aligned}$$

**1c)**

$$\text{Total Mutant Sequences} = \left[ \left[ \binom{N-1}{1} (n-1)^2 \right]^x \right]^y$$

$$= \left[ [(6-1)(4-1)^2]^3 \right]^2$$

$$\approx 8.3 \times 10^9$$

**1d)**

$$\text{Total Mutant Sequences} = \left[ \left[ \binom{N-1}{1} (n-1)^2 \right]^x \right] \times y$$

$$= \left[ [(6-1)(4-1)^2]^3 \right] \times 2$$

$$\approx 1.5 \times 10^5$$

## **Supplementary Figure 1. The number of mutant sequences that can be produced using various mutation-generation strategies.**

"N" represents the number of nucleotide positions to mutate per predicted target site. ImiRP introduces mutations only into the 6mer core seed region of each predicted target site. The number of the four nucleotide bases to use for mutagenesis is represented by "n". "x" and "y" designate the number of specified target sites per independent region and the number of independent regions, respectively. **a)** The number of possible mutant sequences produced when at least two nucleotide changes are introduced per target site using any permutation of the four nucleotide bases. In this example, three non-overlapping target sites are present in a single independent region, and the total possible mutants are greater than 60 billion. **b)** When exactly two adjacent nucleotide changes are introduced per site, using any of the four nucleotide bases to generate mutations, the number of possible mutants for a single independent region containing three non-overlapping sites is reduced to approximately 90,000. **c)** If two independent regions containing three target sites each are mutated simultaneously by introducing two adjacent nucleotide changes using any of the four nucleotide bases, over 8 billion mutant sequences are possible. **d)** However, mutating predicted target sites spaced at a distance of seven or more nucleotides apart independent of one another significantly reduces the number of redundant mutations generated. When two independent regions containing three non-overlapping target sites each are mutated in isolation, the number of mutant sequences that need to be processed is reduced to 180,000

```
do:  
  copy input_sequence to mutant  
  for each site in mutationites:  
    for each position in site:  
      set nuc to select_random(allowable_nucleotides)  
      overwrite mutant[position] to nuc  
    end  
  end  
  if mutant acceptable:  
    output mutant to callback  
  end  
while(further mutations are needed)
```

## **Supplementary Figure 2.**

Pseudocode for ImiRP's mutation generation algorithm.

```
for each five_prime in mirbase:
  do:
    set sequence_chunk to sequence[window_start, window_end]
    set match_result to check_conditions(five_prime, sequence_chunk)
    increment window_start
    increment window_end
  while(window_end < sequence_end)
end

function check_conditions(five_prime, sequence_chunk):

end
```

### **Supplementary Figure 3.**

Pseudocode for ImiRP's microRNA target site prediction algorithm.

### 1a) 150 nucleotide segment of human *PAX6* 3'UTR

GTTTTGAAGTTGTTCACTACATATCAAATTAAACCATTGTTGATTGT  
 AAAAAACCATGCCAAAGCCTTTGTATTTCTTTATTATACAGTTTTCTTT  
 TTAACCTTATAGTGTGGTGTACAAATTTTATTTCCATGTTAGATCAACA

| Start Position | miRNA                       | Site Type   | Predicted by |
|----------------|-----------------------------|-------------|--------------|
| 22             | hsa-miR-190a/b              | 8mer        | TS           |
| 35             | hsa-miR-140-5p              | 7mer-m8+G:U | PITA         |
| 60             | hsa-miR-96/182/507/<br>1271 | 7mer-A1     | TS           |

### Summary of ImiRP predictions for wild type human *PAX6* sequence:

| position  | mirna                                                | type           | gu         |
|-----------|------------------------------------------------------|----------------|------------|
| 2         | >hsa-miR-616-5p MIMAT0003284 Homo sapiens            | OS-6mer        | no         |
| 6         | >hsa-miR-513c-3p MIMAT0022728 Homo sapiens           | OS-6mer        | yes        |
| 14        | >hsa-miR-758-3p MIMAT0003879 Homo sapiens            | 6mer           | no         |
| 16        | >hsa-miR-382-5p MIMAT0000737 Homo sapiens            | OS-6mer        | no         |
| 16        | >hsa-miR-494-5p MIMAT0026607 Homo sapiens            | 7mer-A1        | yes        |
| 17        | >hsa-miR-758-5p MIMAT0022929 Homo sapiens            | OS-6mer        | yes        |
| 18        | >hsa-miR-203a-5p MIMAT0031890 Homo sapiens           | 7mer-A1        | yes        |
| 18        | >hsa-miR-140-5p MIMAT0000431 Homo sapiens            | OS-6mer        | yes        |
| 18        | >hsa-miR-876-3p MIMAT0004925 Homo sapiens            | OS-6mer        | yes        |
| 19        | >hsa-miR-20b-3p MIMAT0004752 Homo sapiens            | OS-6mer        | no         |
| 20        | >hsa-miR-299-3p MIMAT0000687 Homo sapiens            | 7mer-A1        | yes        |
| <b>22</b> | <b>&gt;hsa-miR-190a-5p MIMAT0000458 Homo sapiens</b> | <b>8mer</b>    | <b>no</b>  |
| 23        | >hsa-miR-576-3p MIMAT0004796 Homo sapiens            | OS-6mer        | yes        |
| 26        | >hsa-miR-9-5p MIMAT0000441 Homo sapiens              | OS-6mer        | yes        |
| 28        | >hsa-miR-19a-5p MIMAT0004490 Homo sapiens            | 6mer           | yes        |
| 28        | >hsa-miR-19b-1-5p MIMAT0004491 Homo sapiens          | 6mer           | yes        |
| 28        | >hsa-miR-19b-2-5p MIMAT0004492 Homo sapiens          | 6mer           | yes        |
| 29        | >hsa-miR-590-3p MIMAT0004801 Homo sapiens            | 7mer-A1        | no         |
| 30        | >hsa-miR-29a-5p MIMAT0004503 Homo sapiens            | OS-6mer        | yes        |
| 34        | >hsa-miR-487b-5p MIMAT0026614 Homo sapiens           | 6mer           | no         |
| 34        | >hsa-miR-758-5p MIMAT0022929 Homo sapiens            | 7mer-m8        | yes        |
| 35        | >hsa-miR-203a-5p MIMAT0031890 Homo sapiens           | 6mer           | yes        |
| <b>35</b> | <b>&gt;hsa-miR-140-5p MIMAT0000431 Homo sapiens</b>  | <b>7mer-m8</b> | <b>yes</b> |
| 35        | >hsa-miR-584-5p MIMAT0003249 Homo sapiens            | OS-6mer        | no         |
| 35        | >hsa-miR-876-3p MIMAT0004925 Homo sapiens            | OS-6mer        | yes        |
| 37        | >hsa-miR-194-3p MIMAT0004671 Homo sapiens            | 6mer           | yes        |
| 38        | >hsa-miR-106a-3p MIMAT0004517 Homo sapiens           | OS-6mer        | yes        |

|           |                            |                     |                     |                |           |
|-----------|----------------------------|---------------------|---------------------|----------------|-----------|
| 38        | >hsa-miR-128-3p            | MIMAT0000424        | Homo sapiens        | OS-6mer        | yes       |
| 39        | >hsa-miR-132-3p            | MIMAT0000426        | Homo sapiens        | 6mer           | yes       |
| 40        | >hsa-miR-545-3p            | MIMAT0003165        | Homo sapiens        | 7mer-A1        | yes       |
| 40        | >hsa-miR-3065-5p           | MIMAT0015066        | Homo sapiens        | 7mer-A1        | no        |
| 41        | >hsa-miR-302c-5p           | MIMAT0000716        | Homo sapiens        | 6mer           | yes       |
| 41        | >hsa-miR-505-3p            | MIMAT0002876        | Homo sapiens        | 7mer-m8        | yes       |
| 42        | >hsa-miR-34a-3p            | MIMAT0004557        | Homo sapiens        | 7mer-m8        | yes       |
| 42        | >hsa-miR-369-5p            | MIMAT0001621        | Homo sapiens        | OS-6mer        | yes       |
| 43        | >hsa-miR-551b-5p           | MIMAT0004794        | Homo sapiens        | OS-6mer        | no        |
| 45        | >hsa-miR-132-3p            | MIMAT0000426        | Homo sapiens        | OS-6mer        | yes       |
| 46        | >hsa-miR-106a-3p           | MIMAT0004517        | Homo sapiens        | 7mer-A1        | yes       |
| 46        | >hsa-miR-139-5p            | MIMAT0000250        | Homo sapiens        | OS-6mer        | yes       |
| 46        | >hsa-miR-374a-5p           | MIMAT0000727        | Homo sapiens        | 7mer-A1        | yes       |
| 46        | >hsa-miR-374b-5p           | MIMAT0004955        | Homo sapiens        | 7mer-A1        | yes       |
| 47        | >hsa-miR-450b-5p           | MIMAT0004909        | Homo sapiens        | 8mer           | yes       |
| 49        | >hsa-miR-19a-5p            | MIMAT0004490        | Homo sapiens        | OS-6mer        | yes       |
| 49        | >hsa-miR-19b-1-5p          | MIMAT0004491        | Homo sapiens        | OS-6mer        | yes       |
| 49        | >hsa-miR-19b-2-5p          | MIMAT0004492        | Homo sapiens        | OS-6mer        | yes       |
| 49        | >hsa-miR-129-5p            | MIMAT0000242        | Homo sapiens        | 8mer           | yes       |
| 53        | >hsa-miR-329-5p            | MIMAT0026555        | Homo sapiens        | OS-6mer        | no        |
| 54        | >hsa-miR-29b-1-5p          | MIMAT0004514        | Homo sapiens        | OS-6mer        | no        |
| 55        | >hsa-miR-203a-5p           | MIMAT0031890        | Homo sapiens        | 6mer           | yes       |
| 55        | >hsa-miR-140-5p            | MIMAT0000431        | Homo sapiens        | OS-6mer        | yes       |
| 55        | >hsa-miR-584-5p            | MIMAT0003249        | Homo sapiens        | 7mer-m8        | yes       |
| 55        | >hsa-miR-758-5p            | MIMAT0022929        | Homo sapiens        | 6mer           | no        |
| 55        | >hsa-miR-876-3p            | MIMAT0004925        | Homo sapiens        | OS-6mer        | yes       |
| <b>60</b> | <b>&gt;hsa-miR-96-5p</b>   | <b>MIMAT0000095</b> | <b>Homo sapiens</b> | <b>7mer-A1</b> | <b>no</b> |
| <b>60</b> | <b>&gt;hsa-miR-182-5p</b>  | <b>MIMAT0000259</b> | <b>Homo sapiens</b> | <b>7mer-A1</b> | <b>no</b> |
| <b>60</b> | <b>&gt;hsa-miR-1271-5p</b> | <b>MIMAT0005796</b> | <b>Homo sapiens</b> | <b>7mer-A1</b> | <b>no</b> |
| 61        | >hsa-miR-9-5p              | MIMAT0000441        | Homo sapiens        | 7mer-m8        | yes       |
| 63        | >hsa-miR-19a-5p            | MIMAT0004490        | Homo sapiens        | 6mer           | yes       |
| 63        | >hsa-miR-19b-1-5p          | MIMAT0004491        | Homo sapiens        | 6mer           | yes       |
| 63        | >hsa-miR-19b-2-5p          | MIMAT0004492        | Homo sapiens        | 6mer           | yes       |
| 64        | >hsa-miR-329-5p            | MIMAT0026555        | Homo sapiens        | 7mer-m8        | yes       |
| 65        | >hsa-miR-27a-5p            | MIMAT0004501        | Homo sapiens        | 6mer           | yes       |
| 65        | >hsa-miR-3158-3p           | MIMAT0015032        | Homo sapiens        | 7mer-m8        | yes       |
| 66        | >hsa-miR-485-5p            | MIMAT0002175        | Homo sapiens        | 6mer           | yes       |
| 69        | >hsa-miR-340-5p            | MIMAT0004692        | Homo sapiens        | 7mer-m8        | yes       |
| 69        | >hsa-miR-624-3p            | MIMAT0004807        | Homo sapiens        | 7mer-A1        | yes       |
| 70        | >hsa-miR-19a-3p            | MIMAT0000073        | Homo sapiens        | OS-6mer        | yes       |
| 70        | >hsa-miR-19b-3p            | MIMAT0000074        | Homo sapiens        | OS-6mer        | yes       |

a) 150 nucleotide segment of mouse *Pax6* 3'UTR

AAAACTATCTGTTGGTTTTCCAAAGGTTGTTAACAGATGAAGTTTATGT  
 GCAAAAAGGGTAAGATATGAATTC AAGGAGAAGTTGATAGCTAAAAGGT  
 AGAGTGTGTCTTCGATATAATAACAATTTGTTTTATGTCAAAATGTAAGTA

| Start Position | miRNA           | Site Type   | Predicted by |
|----------------|-----------------|-------------|--------------|
| 16             | mmu-miR-7a/b    | 8mer+G:U    | PITA         |
| 21             | mmu-miR-9       | 6mer        | PITA         |
| 44             | mmu-miR-376c    | 7mer-m8+G:U | PITA         |
| 50             | mmu-miR-450b-5p | 7mer-A1     | PITA         |
| 51             | mmu-miR-129-5p  | 8mer        | TS, PITA     |
| 104            | mmu-miR-329     | 6mer        | PITA         |

**Summary of ImiRP predictions for wild type mouse *Pax6* sequence:**

| position | mirna                                       | type    | gu  |
|----------|---------------------------------------------|---------|-----|
| 2        | >mmu-miR-19a-5p MIMAT0004660 Mus musculus   | 7mer-A1 | no  |
| 3        | >mmu-miR-29b-1-5p MIMAT0004523 Mus musculus | OS-6mer | yes |
| 3        | >mmu-miR-29b-2-5p MIMAT0017063 Mus musculus | 6mer    | yes |
| 4        | >mmu-miR-218-2-3p MIMAT0005444 Mus musculus | 6mer    | yes |
| 5        | >mmu-miR-196a-5p MIMAT0000518 Mus musculus  | 7mer-m8 | yes |
| 5        | >mmu-miR-196b-5p MIMAT0001081 Mus musculus  | 7mer-m8 | yes |
| 6        | >mmu-let-7g-5p MIMAT0000121 Mus musculus    | OS-6mer | yes |
| 6        | >mmu-let-7i-5p MIMAT0000122 Mus musculus    | OS-6mer | yes |
| 6        | >mmu-let-7d-5p MIMAT0000383 Mus musculus    | OS-6mer | yes |
| 6        | >mmu-let-7a-5p MIMAT0000521 Mus musculus    | OS-6mer | yes |
| 6        | >mmu-let-7b-5p MIMAT0000522 Mus musculus    | OS-6mer | yes |
| 6        | >mmu-let-7c-5p MIMAT0000523 Mus musculus    | OS-6mer | yes |
| 6        | >mmu-let-7e-5p MIMAT0000524 Mus musculus    | OS-6mer | yes |
| 6        | >mmu-let-7f-5p MIMAT0000525 Mus musculus    | OS-6mer | yes |
| 6        | >mmu-miR-98-5p MIMAT0000545 Mus musculus    | OS-6mer | yes |
| 6        | >mmu-miR-1839-5p MIMAT0009456 Mus musculus  | 6mer    | yes |
| 7        | >mmu-miR-488-5p MIMAT0003449 Mus musculus   | OS-6mer | no  |
| 9        | >mmu-miR-191-5p MIMAT0000221 Mus musculus   | 6mer    | yes |
| 10       | >mmu-miR-194-5p MIMAT0000224 Mus musculus   | OS-6mer | yes |
| 10       | >mmu-miR-196b-3p MIMAT0017170 Mus musculus  | 6mer    | yes |
| 10       | >mmu-miR-421-3p MIMAT0004869 Mus musculus   | 7mer-m8 | yes |
| 11       | >mmu-miR-16-2-3p MIMAT0017018 Mus musculus  | 6mer    | yes |
| 11       | >mmu-miR-338-3p MIMAT0000582 Mus musculus   | 6mer    | yes |
| 11       | >mmu-miR-505-3p MIMAT0003513 Mus musculus   | OS-6mer | yes |



|           |                                                      |                |            |
|-----------|------------------------------------------------------|----------------|------------|
| 11        | >mmu-miR-3098-5p MIMAT0014917 Mus musculus           | OS-6mer        | yes        |
| 14        | >mmu-miR-497a-3p MIMAT0017247 Mus musculus           | 6mer           | no         |
| 14        | >mmu-miR-742-3p MIMAT0004237 Mus musculus            | 7mer-m8        | yes        |
| <b>16</b> | <b>&gt;mmu-miR-7a-5p MIMAT0000677 Mus musculus</b>   | <b>8mer</b>    | <b>yes</b> |
| 17        | >mmu-miR-1958 MIMAT0009431 Mus musculus              | OS-6mer        | yes        |
| 18        | >mmu-miR-204-3p MIMAT0017002 Mus musculus            | OS-6mer        | yes        |
| 18        | >mmu-miR-450a-1-3p MIMAT0017182 Mus musculus         | 8mer           | yes        |
| 18        | >mmu-miR-450b-3p MIMAT0003512 Mus musculus           | 8mer           | yes        |
| 19        | >mmu-miR-3057-5p MIMAT0014822 Mus musculus           | 7mer-A1        | yes        |
| <b>21</b> | <b>&gt;mmu-miR-9-5p MIMAT0000142 Mus musculus</b>    | <b>6mer</b>    | <b>no</b>  |
| 23        | >mmu-miR-511-5p MIMAT0004940 Mus musculus            | OS-6mer        | yes        |
| 23        | >mmu-miR-3061-3p MIMAT0014829 Mus musculus           | OS-6mer        | no         |
| 24        | >mmu-miR-1264-3p MIMAT0014803 Mus musculus           | OS-6mer        | yes        |
| 27        | >mmu-miR-196a-1-3p MIMAT0017013 Mus musculus         | 7mer-A1        | yes        |
| 27        | >mmu-miR-21a-3p MIMAT0004628 Mus musculus            | 7mer-A1        | yes        |
| 28        | >mmu-miR-194-5p MIMAT0000224 Mus musculus            | OS-6mer        | yes        |
| 30        | >mmu-miR-758-5p MIMAT0017235 Mus musculus            | OS-6mer        | yes        |
| 32        | >mmu-miR-544-5p MIMAT0017282 Mus musculus            | OS-6mer        | yes        |
| 38        | >mmu-miR-205-5p MIMAT0000238 Mus musculus            | OS-6mer        | no         |
| 38        | >mmu-miR-335-3p MIMAT0004704 Mus musculus            | OS-6mer        | yes        |
| 39        | >mmu-miR-205-3p MIMAT0017003 Mus musculus            | 6mer           | yes        |
| 40        | >mmu-miR-3099-5p MIMAT0014815 Mus musculus           | OS-6mer        | yes        |
| 40        | >mmu-miR-1964-3p MIMAT0009437 Mus musculus           | OS-6mer        | yes        |
| 41        | >mmu-miR-100-3p MIMAT0017051 Mus musculus            | OS-6mer        | yes        |
| 42        | >mmu-miR-151-3p MIMAT0000161 Mus musculus            | 6mer           | yes        |
| 42        | >mmu-miR-345-3p MIMAT0004656 Mus musculus            | OS-6mer        | yes        |
| 43        | >mmu-miR-30a-5p MIMAT0000128 Mus musculus            | 6mer           | yes        |
| 43        | >mmu-miR-30b-5p MIMAT0000130 Mus musculus            | 6mer           | yes        |
| 43        | >mmu-miR-30e-5p MIMAT0000248 Mus musculus            | 6mer           | yes        |
| 43        | >mmu-miR-30c-5p MIMAT0000514 Mus musculus            | 6mer           | yes        |
| 43        | >mmu-miR-30d-5p MIMAT0000515 Mus musculus            | 6mer           | yes        |
| 43        | >mmu-miR-384-5p MIMAT0004745 Mus musculus            | 6mer           | yes        |
| 43        | >mmu-miR-463-3p MIMAT0004758 Mus musculus            | OS-6mer        | yes        |
| 44        | >mmu-miR-340-5p MIMAT0004651 Mus musculus            | 6mer           | yes        |
| 44        | >mmu-miR-376b-3p MIMAT0001092 Mus musculus           | OS-6mer        | yes        |
| <b>44</b> | <b>&gt;mmu-miR-376c-3p MIMAT0003183 Mus musculus</b> | <b>7mer-m8</b> | <b>yes</b> |
| 45        | >mmu-miR-322-3p MIMAT0000549 Mus musculus            | OS-6mer        | yes        |
| 45        | >mmu-miR-410-3p MIMAT0001091 Mus musculus            | 6mer           | yes        |
| 45        | >mmu-miR-344d-3p MIMAT0014808 Mus musculus           | 6mer           | yes        |
| 46        | >mmu-miR-466b-3p MIMAT0004876 Mus musculus           | 6mer           | yes        |
| 46        | >mmu-miR-466c-3p MIMAT0004878 Mus musculus           | 6mer           | yes        |

|           |                                                      |                |           |
|-----------|------------------------------------------------------|----------------|-----------|
| 46        | >mmu-miR-466e-3p MIMAT0004880 Mus musculus           | OS-6mer        | yes       |
| 46        | >mmu-miR-669d-3p MIMAT0017324 Mus musculus           | OS-6mer        | yes       |
| 47        | >mmu-miR-448-3p MIMAT0001533 Mus musculus            | 8mer           | yes       |
| 48        | >mmu-let-7g-3p MIMAT0004519 Mus musculus             | OS-6mer        | yes       |
| 48        | >mmu-let-7i-3p MIMAT0004520 Mus musculus             | 7mer-A1        | yes       |
| 48        | >mmu-let-7a-2-3p MIMAT0017015 Mus musculus           | 7mer-A1        | yes       |
| 48        | >mmu-let-7c-1-3p MIMAT0004622 Mus musculus           | 7mer-A1        | yes       |
| 49        | >mmu-miR-92a-3p MIMAT0000539 Mus musculus            | OS-6mer        | no        |
| 49        | >mmu-miR-25-3p MIMAT0000652 Mus musculus             | OS-6mer        | no        |
| 49        | >mmu-miR-32-5p MIMAT0000654 Mus musculus             | OS-6mer        | no        |
| 49        | >mmu-miR-363-3p MIMAT0000708 Mus musculus            | OS-6mer        | no        |
| 49        | >mmu-miR-92b-3p MIMAT0004899 Mus musculus            | OS-6mer        | no        |
| 50        | >mmu-miR-450a-5p MIMAT0001546 Mus musculus           | 7mer-A1        | yes       |
| 50        | >mmu-miR-452-5p MIMAT0001637 Mus musculus            | OS-6mer        | no        |
| <b>50</b> | <b>&gt;mmu-miR-450b-5p MIMAT0003511 Mus musculus</b> | <b>7mer-A1</b> | <b>no</b> |
| <b>51</b> | <b>&gt;mmu-miR-129-5p MIMAT0000209 Mus musculus</b>  | <b>8mer</b>    | <b>no</b> |
| 51        | >mmu-miR-19b-1-5p MIMAT0017065 Mus musculus          | OS-6mer        | no        |
| 51        | >mmu-miR-669b-5p MIMAT0003476 Mus musculus           | OS-6mer        | yes       |
| 55        | >mmu-miR-130a-5p MIMAT0016983 Mus musculus           | 7mer-m8        | yes       |
| 56        | >mmu-miR-204-5p MIMAT0000237 Mus musculus            | OS-6mer        | no        |
| 56        | >mmu-miR-130b-5p MIMAT0004583 Mus musculus           | 6mer           | yes       |
| 56        | >mmu-miR-211-5p MIMAT0000668 Mus musculus            | OS-6mer        | no        |
| 57        | >mmu-miR-129-1-3p MIMAT0016994 Mus musculus          | OS-6mer        | yes       |
| 57        | >mmu-miR-129-2-3p MIMAT0000544 Mus musculus          | OS-6mer        | yes       |
| 57        | >mmu-miR-362-5p MIMAT0000706 Mus musculus            | 7mer-A1        | yes       |
| 57        | >mmu-miR-1249-3p MIMAT0010560 Mus musculus           | OS-6mer        | yes       |
| 57        | >mmu-miR-500-5p MIMAT0017258 Mus musculus            | 7mer-A1        | yes       |
| 57        | >mmu-miR-3061-3p MIMAT0014829 Mus musculus           | 8mer           | yes       |
| 58        | >mmu-miR-18a-3p MIMAT0004626 Mus musculus            | OS-6mer        | yes       |
| 58        | >mmu-miR-874-3p MIMAT0004853 Mus musculus            | 7mer-A1        | yes       |
| 60        | >mmu-miR-429-5p MIMAT0017178 Mus musculus            | 7mer-m8        | no        |
| 61        | >mmu-miR-200b-5p MIMAT0004545 Mus musculus           | 8mer           | no        |
| 61        | >mmu-miR-200a-5p MIMAT0004619 Mus musculus           | 8mer           | no        |
| 61        | >mmu-miR-200c-5p MIMAT0004663 Mus musculus           | 8mer           | yes       |
| 61        | >mmu-miR-431-5p MIMAT0001418 Mus musculus            | OS-6mer        | yes       |
| 62        | >mmu-miR-1941-3p MIMAT0009406 Mus musculus           | 7mer-A1        | no        |
| 69        | >mmu-miR-10a-3p MIMAT0004659 Mus musculus            | OS-6mer        | yes       |
| 69        | >mmu-miR-32-3p MIMAT0017050 Mus musculus             | 6mer           | yes       |
| 71        | >mmu-miR-183-3p MIMAT0004539 Mus musculus            | 7mer-A1        | no        |
| 71        | >mmu-miR-3068-3p MIMAT0014843 Mus musculus           | OS-6mer        | no        |
| 73        | >mmu-miR-470-5p MIMAT0002111 Mus musculus            | OS-6mer        | yes       |

|     |                    |              |              |         |     |
|-----|--------------------|--------------|--------------|---------|-----|
| 73  | >mmu-miR-547-5p    | MIMAT0017210 | Mus musculus | OS-6mer | yes |
| 74  | >mmu-miR-212-5p    | MIMAT0017053 | Mus musculus | 7mer-A1 | yes |
| 74  | >mmu-miR-3075-3p   | MIMAT0014859 | Mus musculus | 7mer-m8 | yes |
| 75  | >mmu-miR-362-5p    | MIMAT0000706 | Mus musculus | OS-6mer | no  |
| 75  | >mmu-miR-500-5p    | MIMAT0017258 | Mus musculus | OS-6mer | no  |
| 76  | >mmu-miR-130a-5p   | MIMAT0016983 | Mus musculus | 7mer-A1 | yes |
| 76  | >mmu-miR-130b-5p   | MIMAT0004583 | Mus musculus | 7mer-A1 | yes |
| 76  | >mmu-miR-103-1-5p  | MIMAT0017024 | Mus musculus | OS-6mer | yes |
| 76  | >mmu-miR-103-2-5p  | MIMAT0017025 | Mus musculus | OS-6mer | yes |
| 76  | >mmu-miR-107-5p    | MIMAT0017048 | Mus musculus | OS-6mer | yes |
| 78  | >mmu-miR-22-5p     | MIMAT0004629 | Mus musculus | OS-6mer | yes |
| 79  | >mmu-miR-103-1-5p  | MIMAT0017024 | Mus musculus | OS-6mer | yes |
| 79  | >mmu-miR-103-2-5p  | MIMAT0017025 | Mus musculus | OS-6mer | yes |
| 79  | >mmu-miR-107-5p    | MIMAT0017048 | Mus musculus | OS-6mer | yes |
| 79  | >mmu-miR-320-5p    | MIMAT0017057 | Mus musculus | OS-6mer | no  |
| 81  | >mmu-miR-3099-5p   | MIMAT0014815 | Mus musculus | 8mer    | yes |
| 81  | >mmu-miR-1964-3p   | MIMAT0009437 | Mus musculus | 8mer    | yes |
| 83  | >mmu-miR-434-5p    | MIMAT0001421 | Mus musculus | OS-6mer | yes |
| 84  | >mmu-miR-34a-3p    | MIMAT0017022 | Mus musculus | 7mer-A1 | yes |
| 84  | >mmu-miR-369-5p    | MIMAT0003185 | Mus musculus | OS-6mer | yes |
| 84  | >mmu-miR-505-3p    | MIMAT0003513 | Mus musculus | 7mer-A1 | yes |
| 85  | >mmu-miR-361-5p    | MIMAT0000704 | Mus musculus | 6mer    | yes |
| 85  | >mmu-miR-3074-1-3p | MIMAT0014857 | Mus musculus | OS-6mer | yes |
| 86  | >mmu-miR-215-3p    | MIMAT0017169 | Mus musculus | 6mer    | yes |
| 88  | >mmu-miR-101a-5p   | MIMAT0004526 | Mus musculus | OS-6mer | yes |
| 94  | >mmu-miR-130a-5p   | MIMAT0016983 | Mus musculus | OS-6mer | yes |
| 95  | >mmu-miR-511-5p    | MIMAT0004940 | Mus musculus | 7mer-m8 | yes |
| 95  | >mmu-miR-3061-3p   | MIMAT0014829 | Mus musculus | 7mer-m8 | no  |
| 96  | >mmu-miR-532-5p    | MIMAT0002889 | Mus musculus | OS-6mer | yes |
| 97  | >mmu-miR-3106-3p   | MIMAT0014818 | Mus musculus | 7mer-A1 | yes |
| 97  | >mmu-miR-3110-5p   | MIMAT0014951 | Mus musculus | 7mer-m8 | yes |
| 98  | >mmu-miR-346-5p    | MIMAT0000597 | Mus musculus | OS-6mer | yes |
| 99  | >mmu-miR-676-5p    | MIMAT0003781 | Mus musculus | 6mer    | no  |
| 102 | >mmu-miR-181a-5p   | MIMAT0000210 | Mus musculus | 6mer    | yes |
| 102 | >mmu-miR-181c-5p   | MIMAT0000674 | Mus musculus | 6mer    | yes |
| 102 | >mmu-miR-181b-5p   | MIMAT0000673 | Mus musculus | 6mer    | yes |
| 102 | >mmu-miR-543-3p    | MIMAT0003168 | Mus musculus | OS-6mer | yes |
| 102 | >mmu-miR-181d-5p   | MIMAT0004324 | Mus musculus | 6mer    | yes |
| 102 | >mmu-miR-574-3p    | MIMAT0004894 | Mus musculus | 6mer    | yes |
| 102 | >mmu-miR-3572-3p   | MIMAT0020636 | Mus musculus | 6mer    | yes |
| 103 | >mmu-miR-23b-3p    | MIMAT0000125 | Mus musculus | OS-6mer | yes |

|            |                           |                     |                     |             |           |
|------------|---------------------------|---------------------|---------------------|-------------|-----------|
| 103        | >mmu-miR-106b-3p          | MIMAT0004582        | Mus musculus        | 6mer        | yes       |
| 103        | >mmu-miR-23a-3p           | MIMAT0000532        | Mus musculus        | OS-6mer     | yes       |
| 103        | >mmu-miR-1b-5p            | MIMAT0005835        | Mus musculus        | 7mer-m8     | yes       |
| <b>104</b> | <b>&gt;mmu-miR-329-3p</b> | <b>MIMAT0000567</b> | <b>Mus musculus</b> | <b>6mer</b> | <b>no</b> |
| 104        | >mmu-miR-362-3p           | MIMAT0004684        | Mus musculus        | 6mer        | no        |
| 104        | >mmu-miR-466b-3p          | MIMAT0004876        | Mus musculus        | OS-6mer     | yes       |
| 104        | >mmu-miR-466c-3p          | MIMAT0004878        | Mus musculus        | OS-6mer     | yes       |
| 104        | >mmu-miR-466m-3p          | MIMAT0014883        | Mus musculus        | 6mer        | yes       |
| 104        | >mmu-miR-466o-3p          | MIMAT0014886        | Mus musculus        | 6mer        | yes       |
| 106        | >mmu-miR-124-3p           | MIMAT0000134        | Mus musculus        | 7mer-m8     | yes       |
| 106        | >mmu-miR-3095-3p          | MIMAT0014912        | Mus musculus        | 6mer        | yes       |
| 107        | >mmu-miR-208a-3p          | MIMAT0000520        | Mus musculus        | OS-6mer     | yes       |
| 107        | >mmu-miR-743a-3p          | MIMAT0004238        | Mus musculus        | OS-6mer     | no        |
| 107        | >mmu-miR-743b-3p          | MIMAT0004840        | Mus musculus        | OS-6mer     | no        |
| 107        | >mmu-miR-208b-3p          | MIMAT0004939        | Mus musculus        | OS-6mer     | yes       |
| 107        | >mmu-miR-6540-5p          | MIMAT0025585        | Mus musculus        | OS-6mer     | yes       |
| 108        | >mmu-miR-7a-5p            | MIMAT0000677        | Mus musculus        | OS-6mer     | no        |
| 109        | >mmu-miR-151-5p           | MIMAT0004536        | Mus musculus        | 7mer-A1     | yes       |
| 109        | >mmu-miR-802-3p           | MIMAT0017240        | Mus musculus        | 7mer-A1     | yes       |
| 112        | >mmu-miR-325-3p           | MIMAT0004640        | Mus musculus        | OS-6mer     | yes       |
| 118        | >mmu-miR-503-3p           | MIMAT0004790        | Mus musculus        | OS-6mer     | yes       |
| 119        | >mmu-miR-223-5p           | MIMAT0017056        | Mus musculus        | OS-6mer     | no        |
| 119        | >mmu-miR-1198-5p          | MIMAT0005859        | Mus musculus        | OS-6mer     | yes       |

### 1c) 150 nucleotide segment of fly *Ey* 3'UTR

TATCTAAAGGAGGCCATAATAAATCGAATTTACATATCTCTTGAAAAATA  
 ATGGAGGTTGTAGAAAATAACATTTGTATGTATAAATTATATAGTTCCGC  
 CCATTAAATCCAATCTATAGTGTAGAATAATTGGTGTAATTAATGATA

| Start Position | miRNA        | Site Type   | Predicted by |
|----------------|--------------|-------------|--------------|
| 16             | dme-miR-1000 | 7mer-A1+G:U | PITA         |
| 26             | dme-miR-1014 | 7mer-A1     | TS           |
| 32             | dme-miR-190  | 7mer-m8     | TS           |
| 34             | dme-miR-977  | 7mer-m8     | TS           |

### Summary of ImiRP predictions for wild type fly *Ey* sequence:

| position  | mirna                                                                  | type           | gu         |
|-----------|------------------------------------------------------------------------|----------------|------------|
| 1         | >dme-miR-983-3p MIMAT0020880 <i>Drosophila melanogaster</i>            | 8mer           | yes        |
| 2         | >dme-miR-303-5p MIMAT0000388 <i>Drosophila melanogaster</i>            | 7mer-A1        | yes        |
| 4         | >dme-miR-9a-5p MIMAT0000114 <i>Drosophila melanogaster</i>             | 6mer           | yes        |
| 4         | >dme-miR-79-5p MIMAT0020814 <i>Drosophila melanogaster</i>             | 6mer           | yes        |
| 4         | >dme-miR-9c-5p MIMAT0000392 <i>Drosophila melanogaster</i>             | 6mer           | yes        |
| 4         | >dme-miR-9b-5p MIMAT0000395 <i>Drosophila melanogaster</i>             | 6mer           | yes        |
| 6         | >dme-miR-316-5p MIMAT0000408 <i>Drosophila melanogaster</i>            | OS-6mer        | yes        |
| 9         | >dme-miR-282-5p MIMAT0000346 <i>Drosophila melanogaster</i>            | OS-6mer        | yes        |
| <b>16</b> | <b>&gt;dme-miR-1000-5p MIMAT0005520 <i>Drosophila melanogaster</i></b> | <b>7mer-A1</b> | <b>yes</b> |
| 21        | >dme-bantam-5p MIMAT0020823 <i>Drosophila melanogaster</i>             | 7mer-A1        | yes        |
| 22        | >dme-miR-315-5p MIMAT0000407 <i>Drosophila melanogaster</i>            | 7mer-m8        | yes        |
| 24        | >dme-miR-314-3p MIMAT0000406 <i>Drosophila melanogaster</i>            | 6mer           | no         |
| 25        | >dme-miR-10-3p MIMAT0012531 <i>Drosophila melanogaster</i>             | 8mer           | no         |
| 25        | >dme-miR-1006-3p MIMAT0005019 <i>Drosophila melanogaster</i>           | 8mer           | no         |
| 26        | >dme-miR-958-3p MIMAT0005471 <i>Drosophila melanogaster</i>            | OS-6mer        | yes        |
| <b>26</b> | <b>&gt;dme-miR-1014-3p MIMAT0005027 <i>Drosophila melanogaster</i></b> | <b>7mer-A1</b> | <b>no</b>  |
| 27        | >dme-miR-998-5p MIMAT0020898 <i>Drosophila melanogaster</i>            | OS-6mer        | yes        |
| 28        | >dme-miR-4969-5p MIMAT0020195 <i>Drosophila melanogaster</i>           | OS-6mer        | no         |
| 29        | >dme-miR-971-5p MIMAT0020868 <i>Drosophila melanogaster</i>            | OS-6mer        | no         |
| 31        | >dme-miR-9388-5p MIMAT0035238 <i>Drosophila melanogaster</i>           | 6mer           | no         |
| <b>32</b> | <b>&gt;dme-miR-190-5p MIMAT0005467 <i>Drosophila melanogaster</i></b>  | <b>7mer-m8</b> | <b>no</b>  |
| 34        | >dme-miR-975-3p MIMAT0020872 <i>Drosophila melanogaster</i>            | OS-6mer        | yes        |
| <b>34</b> | <b>&gt;dme-miR-977-3p MIMAT0005493 <i>Drosophila melanogaster</i></b>  | <b>7mer-m8</b> | <b>no</b>  |
| 35        | >dme-let-7-5p MIMAT0000396 <i>Drosophila melanogaster</i>              | 6mer           | yes        |
| 35        | >dme-miR-317-5p MIMAT0020843 <i>Drosophila melanogaster</i>            | 6mer           | yes        |
| 35        | >dme-miR-967-5p MIMAT0005482 <i>Drosophila melanogaster</i>            | 6mer           | no         |
| 35        | >dme-miR-984-5p MIMAT0005500 <i>Drosophila melanogaster</i>            | 6mer           | yes        |

|    |                   |              |                         |         |     |
|----|-------------------|--------------|-------------------------|---------|-----|
| 37 | >dme-miR-281-1-5p | MIMAT0000344 | Drosophila melanogaster | 6mer    | no  |
| 40 | >dme-miR-314-3p   | MIMAT0000406 | Drosophila melanogaster | OS-6mer | yes |
| 40 | >dme-miR-315-3p   | MIMAT0020841 | Drosophila melanogaster | 8mer    | yes |
| 43 | >dme-miR-980-5p   | MIMAT0020877 | Drosophila melanogaster | 8mer    | yes |

#### **Supplementary Figure 4. Testing the ImiRP Target Site Predictor**

Several 3'UTR segments from three different species were provided as input to ImiRP. ImiRP target site predictions were compared to predictions made by PITA and TargetScan for each sequence. MiRBase was used to validate the ImiRP target site predictions. Three sample test results are provided. a) 150 nucleotide segment of the human *PAX6* 3'UTR: ImiRP successfully identified target sites for miR-190a, miR-140-5p, miR-96, miR-182, and miR-1271. Target sites for miR-190b and miR-507 were not detected because these miRNAs are not high confidence miRNAs. miR-190b has less than five reads mapping to its 3' arm, and miR-507 has no reads mapping to the 5' arm. b) 150 nucleotide segment of the mouse *Pax6* 3'UTR: ImiRP successfully identified predicted target sites for miR-7a, miR-9, miR-376c, miR-450b-5p, miR-129-5p, and miR-329. miR-7b was not detected because this miRNA is not present in the miRBase version 21 high confidence dataset. c) 150 nucleotide segment of the fly *Ey* 3'UTR: ImiRP successfully identified predicted target sites for miR-1000, miR-1014, miR-190, and miR-977.



|    |                    |         |     |                    |         |     |
|----|--------------------|---------|-----|--------------------|---------|-----|
| 24 | >mmu-miR-1264-3p   | OS-6mer | yes |                    |         |     |
| 24 |                    |         |     | >mmu-miR-883a-3p   | 6mer    | yes |
| 24 |                    |         |     | >mmu-miR-883b-3p   | 6mer    | yes |
| 24 |                    |         |     | >mmu-miR-872-3p    | OS-6mer | yes |
| 26 |                    |         |     | >mmu-miR-674-3p    | 6mer    | yes |
| 27 | >mmu-miR-196a-1-3p | 7mer-A1 | yes | >mmu-miR-196a-1-3p | 7mer-A1 | yes |
| 27 | >mmu-miR-21a-3p    | 7mer-A1 | yes | >mmu-miR-21a-3p    | 7mer-A1 | yes |
| 28 | >mmu-miR-194-5p    | OS-6mer | yes | >mmu-miR-194-5p    | OS-6mer | yes |
| 30 | >mmu-miR-758-5p    | OS-6mer | yes | >mmu-miR-758-5p    | OS-6mer | yes |
| 32 | >mmu-miR-544-5p    | OS-6mer | yes | >mmu-miR-544-5p    | OS-6mer | yes |
| 38 | >mmu-miR-205-5p    | OS-6mer | no  | >mmu-miR-205-5p    | OS-6mer | no  |
| 38 | >mmu-miR-335-3p    | OS-6mer | yes | >mmu-miR-335-3p    | OS-6mer | yes |
| 39 | >mmu-miR-205-3p    | 6mer    | yes | >mmu-miR-205-3p    | 6mer    | yes |
| 40 | >mmu-miR-3099-5p   | OS-6mer | yes |                    |         |     |
| 40 | >mmu-miR-1964-3p   | OS-6mer | yes |                    |         |     |
| 41 | >mmu-miR-100-3p    | OS-6mer | yes |                    |         |     |
| 42 | >mmu-miR-151-3p    | 6mer    | yes |                    |         |     |
| 42 | >mmu-miR-345-3p    | OS-6mer | yes |                    |         |     |
| 43 | >mmu-miR-30a-5p    | 6mer    | yes |                    |         |     |
| 43 | >mmu-miR-30b-5p    | 6mer    | yes |                    |         |     |
| 43 | >mmu-miR-30e-5p    | 6mer    | yes |                    |         |     |
| 43 | >mmu-miR-30c-5p    | 6mer    | yes |                    |         |     |
| 43 | >mmu-miR-30d-5p    | 6mer    | yes |                    |         |     |
| 43 | >mmu-miR-384-5p    | 6mer    | yes |                    |         |     |
| 43 | >mmu-miR-463-3p    | OS-6mer | yes |                    |         |     |
| 43 |                    |         |     | >mmu-miR-742-5p    | 6mer    | yes |
| 43 |                    |         |     | >mmu-miR-1839-3p   | OS-6mer | yes |
| 44 | >mmu-miR-340-5p    | 6mer    | yes |                    |         |     |
| 44 | >mmu-miR-376b-3p   | OS-6mer | yes |                    |         |     |
| 44 | >mmu-miR-376c-3p   | 7mer-m8 | yes |                    |         |     |
| 45 | >mmu-miR-322-3p    | OS-6mer | yes |                    |         |     |
| 45 | >mmu-miR-410-3p    | 6mer    | yes |                    |         |     |
| 45 | >mmu-miR-344d-3p   | 6mer    | yes |                    |         |     |
| 45 |                    |         |     | >mmu-miR-448-5p    | OS-6mer | yes |
| 45 |                    |         |     | >mmu-miR-667-3p    | OS-6mer | yes |
| 45 |                    |         |     | >mmu-miR-3093-5p   | 6mer    | yes |
| 46 |                    |         |     | >mmu-miR-329-3p    | OS-6mer | no  |
| 46 |                    |         |     | >mmu-miR-362-3p    | OS-6mer | no  |
| 46 | >mmu-miR-466b-3p   | 6mer    | yes |                    |         |     |
| 46 | >mmu-miR-466c-3p   | 6mer    | yes |                    |         |     |
| 46 | >mmu-miR-466e-3p   | OS-6mer | yes |                    |         |     |
| 46 | >mmu-miR-669d-3p   | OS-6mer | yes |                    |         |     |
| 47 | >mmu-miR-448-3p    | 8mer    | yes |                    |         |     |



|     |                   |         |     |                  |         |     |
|-----|-------------------|---------|-----|------------------|---------|-----|
| 48  | >mmu-let-7g-3p    | OS-6mer | yes |                  |         |     |
| 48  | >mmu-let-7i-3p    | 7mer-A1 | yes |                  |         |     |
| 48  | >mmu-let-7a-2-3p  | 7mer-A1 | yes |                  |         |     |
| 48  | >mmu-let-7c-1-3p  | 7mer-A1 | yes |                  |         |     |
| 49  | >mmu-miR-92a-3p   | OS-6mer | no  |                  |         |     |
| 49  | >mmu-miR-25-3p    | OS-6mer | no  |                  |         |     |
| 49  | >mmu-miR-32-5p    | OS-6mer | no  |                  |         |     |
| 49  | >mmu-miR-363-3p   | OS-6mer | no  |                  |         |     |
| 49  | >mmu-miR-92b-3p   | OS-6mer | no  |                  |         |     |
| 49  |                   |         |     | >mmu-miR-500-3p  | 6mer    | yes |
| 50  | >mmu-miR-450a-5p  | 7mer-A1 | yes |                  |         |     |
| 50  | >mmu-miR-452-5p   | OS-6mer | no  |                  |         |     |
| 50  | >mmu-miR-450b-5p  | 7mer-A1 | no  |                  |         |     |
| 51  | >mmu-miR-129-5p   | 8mer    | no  |                  |         |     |
| 51  | >mmu-miR-19b-1-5p | OS-6mer | no  |                  |         |     |
| 51  | >mmu-miR-669b-5p  | OS-6mer | yes |                  |         |     |
| 51  |                   |         |     | >mmu-miR-652-3p  | OS-6mer | yes |
| 55  | >mmu-miR-130a-5p  | 7mer-m8 | yes |                  |         |     |
| 56  |                   |         |     | >mmu-miR-130a-5p | 6mer    | yes |
| 56  | >mmu-miR-204-5p   | OS-6mer | no  | >mmu-miR-204-5p  | OS-6mer | no  |
| 56  | >mmu-miR-130b-5p  | 6mer    | yes | >mmu-miR-130b-5p | 6mer    | yes |
| 56  | >mmu-miR-211-5p   | OS-6mer | no  | >mmu-miR-211-5p  | OS-6mer | no  |
| ... |                   |         |     |                  |         |     |
| 98  | >mmu-miR-346-5p   | OS-6mer | yes | >mmu-miR-346-5p  | OS-6mer | yes |
| 99  | >mmu-miR-676-5p   | 6mer    | no  | >mmu-miR-676-5p  | 6mer    | no  |
| 102 | >mmu-miR-181a-5p  | 6mer    | yes |                  |         |     |
| 102 | >mmu-miR-181c-5p  | 6mer    | yes |                  |         |     |
| 102 | >mmu-miR-181b-5p  | 6mer    | yes |                  |         |     |
| 102 | >mmu-miR-543-3p   | OS-6mer | yes |                  |         |     |
| 102 | >mmu-miR-181d-5p  | 6mer    | yes |                  |         |     |
| 102 | >mmu-miR-574-3p   | 6mer    | yes |                  |         |     |
| 102 | >mmu-miR-3572-3p  | 6mer    | yes |                  |         |     |
| 102 |                   |         |     | >mmu-miR-668-3p  | OS-6mer | yes |
| 103 |                   |         |     | >mmu-miR-136-5p  | OS-6mer | yes |
| 103 | >mmu-miR-23b-3p   | OS-6mer | yes |                  |         |     |
| 103 | >mmu-miR-106b-3p  | 6mer    | yes |                  |         |     |
| 103 | >mmu-miR-23a-3p   | OS-6mer | yes |                  |         |     |
| 103 | >mmu-miR-1b-5p    | 7mer-m8 | yes |                  |         |     |
| 104 | >mmu-miR-329-3p   | 6mer    | no  |                  |         |     |
| 104 | >mmu-miR-362-3p   | 6mer    | no  |                  |         |     |
| 104 | >mmu-miR-466b-3p  | OS-6mer | yes |                  |         |     |
| 104 | >mmu-miR-466c-3p  | OS-6mer | yes |                  |         |     |
| 104 | >mmu-miR-466m-3p  | 6mer    | yes |                  |         |     |

|     |                  |         |     |                   |         |     |
|-----|------------------|---------|-----|-------------------|---------|-----|
| 104 | >mmu-miR-466o-3p | 6mer    | yes |                   |         |     |
| 106 | >mmu-miR-124-3p  | 7mer-m8 | yes |                   |         |     |
| 106 | >mmu-miR-3095-3p | 6mer    | yes |                   |         |     |
| 106 |                  |         |     | >mmu-miR-615-5p   | OS-6mer | yes |
| 107 |                  |         |     | >mmu-miR-540-5p   | OS-6mer | yes |
| 107 | >mmu-miR-208a-3p | OS-6mer | yes |                   |         |     |
| 107 | >mmu-miR-743a-3p | OS-6mer | no  |                   |         |     |
| 107 | >mmu-miR-743b-3p | OS-6mer | no  |                   |         |     |
| 107 | >mmu-miR-208b-3p | OS-6mer | yes |                   |         |     |
| 107 | >mmu-miR-6540-5p | OS-6mer | yes |                   |         |     |
| 108 | >mmu-miR-7a-5p   | OS-6mer | no  |                   |         |     |
| 108 |                  |         |     | >mmu-miR-1843b-5p | OS-6mer | yes |
| 109 | >mmu-miR-151-5p  | 7mer-A1 | yes |                   |         |     |
| 109 | >mmu-miR-802-3p  | 7mer-A1 | yes |                   |         |     |
| 112 | >mmu-miR-325-3p  | OS-6mer | yes | >mmu-miR-325-3p   | OS-6mer | yes |
| 118 | >mmu-miR-503-3p  | OS-6mer | yes | >mmu-miR-503-3p   | OS-6mer | yes |
| 119 | >mmu-miR-223-5p  | OS-6mer | no  | >mmu-miR-223-5p   | OS-6mer | no  |
| 119 | >mmu-miR-1198-5p | OS-6mer | yes | >mmu-miR-1198-5p  | OS-6mer | yes |
| 120 | >mmu-miR-592-5p  | 6mer    | yes | >mmu-miR-592-5p   | 6mer    | yes |
| 120 | >mmu-miR-669a-5p | OS-6mer | yes | >mmu-miR-669a-5p  | OS-6mer | yes |
| 120 | >mmu-miR-669d-5p | OS-6mer | yes | >mmu-miR-669d-5p  | OS-6mer | yes |
| 120 | >mmu-miR-669f-5p | OS-6mer | yes | >mmu-miR-669f-5p  | OS-6mer | yes |
| 120 | >mmu-miR-669l-5p | OS-6mer | yes | >mmu-miR-669l-5p  | OS-6mer | yes |
| 120 | >mmu-miR-669p-5p | OS-6mer | yes | >mmu-miR-669p-5p  | OS-6mer | yes |

### Supplementary Figure 5. Testing the final mutant sequence validity

A 150 nucleotide segment of the mouse *Pax6* 3'UTR was used as input into ImiRP. Six miRNA target sites predicted by PITA and TargetScan (Figure S4b) were selected for mutation. Mutation parameters were set such that three nucleotide changes would be introduced per specified target site, using all four nucleotide bases for mutation. 8mer, 7mer-m8, 7mer-A1 target sites with and without a single G:U pair and 6mer target site without a G:U pair were specified as invalid. As such, the final mutant sequence should not contain any new-created sites of these types. a) Alignment of the 150 nucleotide wild type input sequence with the mutated sequence output by ImiRP. b) Comparison of miRNA target site predictions output by ImiRP for the wild type and mutant mouse *Pax6* 3'UTR segment. All predicted miRNA target sites selected for mutation have been disrupted. Only 6mer+G:U and OS-6mer target sites were newly created upon mutation of the specified target sites.

Supplemental Document:

## Instruction on How to Use ImiRP

### Creating a New Project

1. Type [imirp.org](http://imirp.org) into your web browser. Click on the App tool at the top of the screen, and then select “Create New Project” from the Projects drop-down menu.
2. To create a new project, first provide a project name and a description of the project (optional)

#### Create Project

Project Description   Sequence Input   Target Sites 0

**Project Name**  
Pax6 Project

**Description**  
Mutate 6 predicted miRNA target sites in the mouse Pax6 3'UTR: miR-7, miR-9, miR-376c, miR-450b-5p, miR-129-5p, miR-329

✓ Create Project

In this example, we have named the project “Pax6 Project”, and will mutate six predicted target sites in a segment of the mouse *Pax6* 3'UTR.

3. Next, click on the “Sequence Input” tab of the “Create Project” menu, input the desired 3'UTR sequence and select the species of interest. A FASTA format DNA or RNA sequence can be cut and pasted into the “Sequence” text box. The input sequence is then displayed above the create project tabs. To indicate the species, begin typing the scientific name or three letter organism code into the “Species” text box. All species having miRNA sequences available in miRBase version 21 are available for selection.

```
1  A A A A A C T A T C T G T T G G T T T T C C A A A G G T T G T T A A C A G A T G A A G T T T A T G T 50
51  G C A A A A A A G G G T A A G A T A T G A A T T C A A G G A G A A G T T G A T A G C T A A A A G G T 100
101 A G A G T G T G T C T T C G A T A T A A T A C A A T T T G T T T T A T G T C A A A A T G T A A G T A 150
```

#### Create Project

Project Description   Sequence Input   Target Sites 0

Species   
Macaca mulatta  
Mus musculus

Sequence  
AAAAACTATCTGTTGGTTTTCCAAAGGTTGTTAACAGATGAAGTTTATGTGCAAAAAGGGTAAGATGAATTCAAG  
GAGAAAGTTGATAGCTAAAAGGTAGAGTGTCTTCGATATAATACAATTTGTTTTATGTCAAATGTAAGTA

✓ Create Project

A 150 nucleotide segment of the mouse Pax6 3'UTR has been copied into the sequence text box and is displayed above the project tabs for viewing. We have begun to enter "mmu", the three letter organism code for mouse, into the species text box. Mus musculus is provided as one of the species options for selection, and can be clicked on to define mouse as the desired species.

- Specify the regions of the input sequence, termed mutation sites, into which nucleotide substitutions will be introduced. Identify the input sequence nucleotide position of the first predicted target site to mutate that is complementary to position 7 of the targeting miRNA. Type this number into the "mutation site" text box and click "Add Site". The region of the predicted target site complementary to miRNA positions 2-7 will be bolded in the displayed input sequence. Also, the input sequence position of the start and end of the defined mutation site will be represented in (x, y) format below the mutation sites text box, where x is the first and y is the last nucleotide of the mutation site. This process is repeated for each target site to be mutated.

AAAACTATCTGTTGGTTTTCCAAAGGTTGTTAACAGATGAAGTTTATGTT  
 GCAAAAAGGGTAAGATATGAATCAAGGAGAAGTTGATAGCTAAAAGGT  
 AGAGTGTGTCTTCGATATAATAACAATTTGTTTTATGTCAAAATGTAAGTA

| Start Position | miRNA           | Site Type   |
|----------------|-----------------|-------------|
| 16             | mmu-miR-7a/b    | 8mer+G:U    |
| 21             | mmu-miR-9       | 6mer        |
| 44             | mmu-miR-376c    | 7mer-m8+G:U |
| 50             | mmu-miR-450b-5p | 7mer-A1     |
| 51             | mmu-miR-129-5p  | 8mer        |
| 104            | mmu-miR-329     | 6mer        |

In this example, six miRNA target sites are to be mutated. The start position indicates the first nucleotide position of each miRNA target site, with the first nucleotide of the 3'UTR being position 1. +G:U indicates that the predicted target site contains a single G:U wobble pair. For each predicted target site, the site position complementary to miRNA position 7 is typed into the mutation site text box.

```

1  A A A A A C T A T C T G T T G G | T T T T | C C | A A A G | G T T G T T A A C A G A T G A A G T | T T A T G | T | 50
51 | G | C | A A A A | A A | A G G G T A A G A T A T G A A T T C A A G G A G A A G T T G A T A G C T A A A A G G T 100
101 A G A G T G T G T C T T C G A T A T A A T A C A A T T T G T T T T A T G T C A A A A T G T A A G T A 150

```

## Create Project

Project Description   Sequence Input   Target Sites **5**

[Help](#)

**Mutation sites**

104|   Add Site

|         |          |
|---------|----------|
| (17,22) | <b>X</b> |
| (21,26) | <b>X</b> |
| (45,50) | <b>X</b> |
| (50,55) | <b>X</b> |
| (52,57) | <b>X</b> |

[✔ Create Project](#)

In the provided example, the mutation site for miR-7 was defined by entering 17 into the mutation site text box, and the mutation site for miR-329 is being defined by typing 104. The mutation site corresponding to each predicted target site is indicated in bold in the sequence display, and positions defining the start and end of the mutation sites are listed below the input text box. For example, the mutation site for miR-7 is listed as (17,22), and is defined in bold in the display sequence as |**TTTTCC**|. To remove a mutation site from the list, click the X.

- Once all the project information has been defined, click the “Create Project” button at the bottom left of the page.

### Defining Mutation Parameters

- Once a project has been created, the user is directed to the project page. Here, a mutation request can be submitted.

## Pax6 Project

Overview | Project Parameters | Mutation Requests **0**

Mutate

Results

**Mutation Sites**

- (17, 22)
- (21, 26)
- (45, 50)
- (50, 55)
- (52, 57)
- (104, 109)

**Species**

Mus musculus

**Sequence**

```
1  A A A A A C T A T C T G T T G G | T T T T | C C | A A A G | G T T G T T A A C A G A T G A A G T | T T A T G | T | 50
51  | G | C A A A | A A | A G G G T A A G A T A T G A A T T C A A G G A G A A G T T G A T A G C T A A A A G G T | 100
101 A G A | G T G T G T | C T T C G A T A T A A T A C A A T T T G T T T T A T G T C A A A A T G T A A G T A | 150
```

Clicking on “Overview” on the project page will provide a summary of the information that was input when the project was created. It will also provide information about any mutation requests that have been submitted. Since we have not yet submitted a mutation request the number “0” appears on the mutation request tab and no information is available for viewing.

## Pax6 Project

Overview | Mutate | Results

Help ?

No results!

**Pax6 Project** has no results. To get results, submit a new project mutation request.

Create Mutation Request

Region 17 to 26 **0**

[ T T T T [ C C ] A A A G ]

No valid mutations were produced for this region. Try submitting a new mutation request with less stringent parameters.

Region 45 to 57 **0**

[ T T A T G T ] T [ T G [ C A A A ] A A ]

No valid mutations were produced for this region. Try submitting a new mutation request with less stringent parameters.

Region 104 to 109 **0**

[ G T G T G T ]

No valid mutations were produced for this region. Try submitting a new mutation request with less stringent parameters.

**Assembled Mutant Sequence**

```
1  A A A A A C T A T C T G T T G G | T T T T | C C | A A A G | G T T G T T A A C A G A T G A A G T | T T A T G | T | 50
51  | G | C A A A | A A | A G G G T A A G A T A T G A A T T C A A G G A G A A G T T G A T A G C T A A A A G G T | 100
101 A G A | G T G T G T | C T T C G A T A T A A T A C A A T T T G T T T T A T G T C A A A A T G T A A G T A | 150
```

Download Sequence Analysis

Clicking on “Results” on the project page shows that no mutant sequences have been generated because a mutation request has not been submitted. Mutation sites are grouped

based on inter-site spacing, with sites spaced less than 7 nucleotides apart being grouped into a single “Region”. The nucleotide position of each region is defined based on the start and end positions of the first and last sites in the region, and the mutation sites are displayed in square brackets. For example, the mutation sites corresponding to the predicted miR-7 and miR-9 target sites are present in the first region, which begins at input sequence position 17 and ends at position 26. The mutation sites are displayed as [TTTT[CC]AAAG], with [TTTTCC] defining the mutation site for miR-7 and [CCAAAG] for miR-9.

2. Clicking the “Mutate” option on the project page enables the user to submit a mutation request.
3. Clicking on the “Mutation Strategy” tab allows the user to define the nucleotides that can be used for introducing substitutions into the mutation sites. Using the drop down menu, the user can also specify the number of nucleotide changes required per mutation site.

### Pax6 Project

The screenshot shows the 'Pax6 Project' interface. At the top, there are tabs for 'Overview', 'Mutate', and 'Results'. The 'Mutate' tab is selected. Below the tabs, there is a DNA sequence with mutation sites highlighted in brackets. The sequence is: 1 A A A A A C T A T C T G T T G G [ T T T T [ C C ] A A A G ] S T T G T T A A C A G A T G A A G T T T A T G T | 50  
51 | S C A A A A A A A G G G T A A G A T A T G A A T T C A A G G A G A A G T T G A T A G C T A A A A G G T 100  
101 A G A G T G T G T | C T T C G A T A T A A T A C A A T T T G T T T T A T G T C A A A A T G T A A G T A 150

Below the sequence, there are tabs for 'Project Parameters', 'Mutation Strategy', and 'Define Invalid Sites'. The 'Mutation Strategy' tab is active. Under 'Allowable nucleotides for mutation', there are checkboxes for A, T, C, and G, all of which are checked. Under 'Mutation strategy', there is a dropdown menu set to '3 changes per site'. At the bottom, there is a 'Submit Mutation Request' button.

In this example, we have selected all four nucleotides for mutation and 3 changes per site. This will ensure that three adjacent nucleotide substitutions will be introduced per mutation site using any of the four available nucleotides.

4. Next, clicking on the “Define Invalid Sites” tab enables the user to specify the miRNA target site types that they want to avoid creating upon mutation of the defined mutation sites. By clicking on the target site classes listed in the “Invalid site types” and “Valid site types” lists, and using the arrow buttons, users can move target site types between the two lists.

# Pax6 Project

Overview

Mutate

Results

```
1  A A A A A C T A T C T G T T G G | T T T T | C C | A A A G | G T T G T T A A C A G A T G A A G T | T T A T G | T
51 | G | C | A A A | A A | A G G G T A A G A T A T G A A T T C A A G G A G A A G T T G A T A G C T A A A A G G T
101 A G A | G T G T G T | C T T C G A T A T A A T A C A A T T T G T T T T A T G T C A A A A T G T A A G T A
```

Project Parameters

Mutation Strategy

Define Invalid Sites

Help

Invalid site types

7mer-A1  
8mer  
7mer-m8

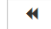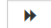

Valid site types

OS-6mer + GU  
7mer-m8 + GU  
OS-6mer  
7mer-A1 + GU  
6mer  
8mer + GU  
6mer + GU

Site type key:

**6mer:** miRNA target site complementary to miRNA positions 2-7

**OS-6mer:** offset-6mer, miRNA target site complementary to miRNA positions 3-8

**7mer-A1:** miRNA target site complementary to miRNA positions 2-7 having an A across from miRNA position 1

**7mer-m8:** miRNA target site complementary to miRNA position 2-8

**8mer:** miRNA target site complementary to miRNA positions 2-8 and having an A across from miRNA position 1

**+GU:** site contains a single G:U wobble pair

Submit Mutation Request

In this example, 7mer-A1, 8mer and 7mer-m8 target site types have been defined as invalid. This means that upon mutation of our six miRNA target sites, no new target sites of these types will be created. However, any target site types listed as “Valid site types” may be created upon mutation.

5. Once mutation parameters have been defined, clicking the “Submit Mutation Request” button will begin the generation of mutant sequences that satisfy the input criteria. The user will be directed to the results page within the project page.

## Constructing a Final Mutant Sequence

1. A maximum of five mutations that satisfy the input mutation criteria will be displayed per region. For each region display box, the original input sequence is displayed above, and the mutated sequences are listed below.



# Pax6 Project

Overview

Mutate

Results

Help

Region 17 to 26

5

- [ T T T T [ C C ] A A A G ]
- [ T T T C [ A G ] C A A G ]
- [ T T T C [ A A ] C A A G ]
- [ T G A A [ C C ] C C C G ]
- [ T A C C [ C C ] A T C C ]
- [ T T T C [ G T ] G A A G ]

Region 45 to 57

5

- [ T T A T G T ] T [ T G [ C A A A ] A A ]
- [ A G G T G T ] T [ T G [ C C T G ] A A ]
- [ T A C C G T ] T [ T G [ A G C A ] A A ]
- [ T G C A G T ] T [ T G [ C C T G ] A A ]
- [ T C G G G T ] T [ T G [ G T C A ] A A ]
- [ A A C T G T ] T [ T G [ C T G G ] A A ]

Region 104 to 109

5

- [ G T G T G T ]
- [ G T A C T T ]
- [ G C T G G T ]
- [ T C T T G T ]
- [ G T G C C G ]
- [ G T G A A G ]

## Assembled Mutant Sequence

```
1  A A A A A C T A T C T G T T G G | T T T T | C C | A A A G | G T T G T T A A C A G A T G A A G T | T T A T G | T | 50
51 | G | C A A A | A A | A G G G T A A G A T A T G A A T T C A A G G A G A A G T T G A T A G C T A A A A G G T 100
101 A G A | G T G T G T | C T T C G A T A T A A T A C A A T T T G T T T T A T G T C A A A A T G T A A G T A 150
```

Download Sequence Analysis

- To select the desired mutant sequence for each region from the list, click on the select bubble to the left of the mutant sequence. One mutant sequence can be selected per region. As mutant sequences are selected for each region the region display box will change green and the “Assembled Mutant Sequence” displayed below will be updated to include the specified nucleotide substitutions.

# Pax6 Project

Overview

Help ?

Mutate

Results

▼ Region 17 to 26 5

- [ T T T T [ C C ] A A A G ]
- [ T T T C [ A G ] C A A G ]
- [ T T T C [ A A ] C A A G ]
- [ T G A A [ C C ] C C C G ]
- [ T A C C [ C C ] A T C C ]
- [ T T T C [ G T ] G A A G ]

▼ Region 45 to 57 5

- [ T T A T G T ] T [ T G [ C A A A ] A A ]
- [ A G G T G T ] T [ T G [ C C T G ] A A ]
- [ T A C C G T ] T [ T G [ A G C A ] A A ]
- [ T G C A G T ] T [ T G [ C C T G ] A A ]
- [ T C G G G T ] T [ T G [ G T C A ] A A ]
- [ A A C T G T ] T [ T G [ C T G G ] A A ]

▼ Region 104 to 109 5

- [ G T G T G T ]
- [ G T A C T T ]
- [ G C T G G T ]
- [ T C T T G T ]
- [ G T G C C G ]
- [ G T G A A G ]

## Assembled Mutant Sequence

```
1  AAAAACTATCTGTTGG|TTTC|AG|CAAG|CTTGTAAACAGATGAAAGT|TACCGT| 50
51 |G|AGCA|AA|AGGGTAAGATATGAATTCAAGGAGAAAGTTGATAGCTAAAAGGT 100
101 AGA|GTGAAG|CTTCGATATAATAACAATTTGTTTTATGTCAAAAATGTAAGTA 150
```

[Download Sequence Analysis](#)

In this example, we have selected the first mutant sequence from Region 17-26 (which includes mutation sites for miR-7 and miR-9), the second mutant sequence for Region 45-57 (which includes mutation sites for miR-376c, miR-450b-5p and miR-129-5p) and the fifth mutant sequence for Region 104-109 (which includes the mutation site for miR-329). The nucleotide substitutions corresponding to these selections have now been displayed in the assembled mutant sequence.

- Once one mutant sequence has been selected per region, clicking the “Download Sequence Analysis” button will enable the user to download a ZIP folder, entitled mutant\_analysis.zip, containing a single TXT file and three CSV files. The TXT file contains the project information, input sequence and final mutant sequence. The CSV files can be opened using Excel and contain information about the predicted miRNA target sites in the input sequence, predicted target sites in the mutant sequence, and all predicted target sites that have been newly created in the mutant sequence.

If the mutation criteria are too stringent and successful mutations are not generated, returning to the mutate page within the project page will enable the user to specify new mutation
